# Supplementary material for: Thermodynamic modelling of cements clinkering process as a tool for optimising the proportioning of raw meals containing alternative materials
Source: PubMed Central journal article supplement (PMC10579411; doi:10.1038/s41598-023-44078-7), 2023-10-16
Supplement: 41598_2023_44078_MOESM1_ESM.pdf [file 41598_2023_44078_MOESM1_ESM.pdf]

# Thermodynamic modelling of cements clinkering process as a tool for optimising the proportioning of raw meals containing alternative materials

*Ana R. D. Costa, Mateus V. Coppe, Wagner V. Bielefeldt, Susan A. Bernal, Leon Black, Ana P. Kirchheim, and Jardel P. Gonçalves*

## Supplementary information

### *Example of determining the equations for modelling*

Table S1 shows a simplified example of the oxide composition of the raw materials to illustrate the calculation of the input equations for the dosing method by thermodynamic modelling. The example considers co-processing 10 wt.% SFCC and the alumina modulus set to 1.6.

| Oxides (%)                     | SFCC  | CaCO <sub>3</sub> AP | SiO <sub>2</sub> AP | Fe <sub>2</sub> O <sub>3</sub> AP |
|--------------------------------|-------|----------------------|---------------------|-----------------------------------|
| SiO <sub>2</sub>               | 55.00 | 1.00                 | 100.00              | 0.00                              |
| Al <sub>2</sub> O <sub>3</sub> | 44.00 | 1.00                 | 0.00                | 1.00                              |
| Fe <sub>2</sub> O <sub>3</sub> | 1.00  | 0.00                 | 0.00                | 98.00                             |
| CaO                            | 0.00  | 56.00                | 0.00                | 1.00                              |
| CO <sub>2</sub>                | 0.00  | 42.00                | 0.00                | 0.00                              |

**Table S1.** Oxide composition of the raw materials for the simplified example.

The determination of the fixed Fe<sub>2</sub>O<sub>3</sub> AP content is shown in equation S1.

$$F_{\text{fixed}} = \frac{10 \cdot 44.00}{1.6 \cdot 98.00} = 2.81\% \quad (\text{S1})$$

The angular coefficients for the input equations are calculated as in equation S2.

$$\begin{bmatrix} A_{\text{SiO}_2} \\ A_{\text{Al}_2\text{O}_3} \\ A_{\text{Fe}_2\text{O}_3} \\ A_{\text{CaO}} \\ A_{\text{CO}_2} \end{bmatrix} = \begin{bmatrix} 0.55 & 0.01 & 1.00 & 0.00 \\ 0.44 & 0.01 & 0.00 & 0.01 \\ 0.01 & 0.00 & 0.00 & 0.98 \\ 0.00 & 0.56 & 0.00 & 0.01 \\ -0.00 & 0.42 & 0.00 & 0.00 \end{bmatrix} \cdot \begin{bmatrix} 0 \\ -1 \\ 1 \\ 0 \end{bmatrix} = \begin{bmatrix} 0.99 \\ -0.01 \\ 0.00 \\ -0.56 \\ -0.42 \end{bmatrix} \quad (\text{S2})$$

The linear coefficient for each oxide is calculated from Equation S3. Where S<sub>fixed</sub> was the fixed SFCC content for the system (10 wt.%), C<sub>max</sub> was the maximum CaCO<sub>3</sub> AP content in the raw meal (100 - S<sub>fixed</sub> - F<sub>fixed</sub> = 87.19), S<sub>min</sub> was the minimum content of SiO<sub>2</sub> AP (0 wt.%), and F<sub>fixed</sub> was the content of Fe<sub>2</sub>O<sub>3</sub> AP fixed in the system (2.81 wt.%).

$$\begin{bmatrix} B_{\text{SiO}_2} \\ B_{\text{Al}_2\text{O}_3} \\ B_{\text{Fe}_2\text{O}_3} \\ B_{\text{CaO}} \\ B_{\text{CO}_2} \end{bmatrix} = \begin{bmatrix} 0.55 & 0.01 & 1.00 & 0.00 \\ 0.44 & 0.01 & 0.00 & 0.01 \\ 0.01 & 0.00 & 0.00 & 0.98 \\ 0.00 & 0.56 & 0.00 & 0.01 \\ -0.00 & 0.42 & 0.00 & 0.00 \end{bmatrix} \cdot \begin{bmatrix} 10.00 \\ 87.19 \\ 0.00 \\ 2.81 \end{bmatrix} = \begin{bmatrix} 6.37 \\ 5.30 \\ 2.85 \\ 48.85 \\ 36.62 \end{bmatrix} \quad (\text{S3})$$

In this context, the linear equations applied as inputs in FactSage would be indicated below (S4 to S8). The variable *x* (SiO<sub>2</sub> AP content) would be configured in the software to go through values from 0 to 22.5% with a step of 0.5, covering 46 scenarios (raw meal compositions).

$$Y_{\text{SiO}_2} = 6.37 + 0.99x \quad (\text{S4})$$

$$Y_{\text{Al}_2\text{O}_3} = 5.30 - 0.01x \quad (\text{S5})$$

$$Y_{\text{Fe}_2\text{O}_3} = 2.85 \quad (\text{S6})$$

$$Y_{\text{CaO}} = 48.85 - 0.56x \quad (\text{S7})$$

$$Y_{\text{CO}_2} = 36.62 - 0.42x \quad (\text{S8})$$

## Oxide composition of modelled systems

Table S2 details the oxide composition of the clinker raw meals dosed in this study.

| Sample | CaO   | SiO <sub>2</sub> | Fe <sub>2</sub> O <sub>3</sub> | Al <sub>2</sub> O <sub>3</sub> | MgO  | SO <sub>3</sub> | P <sub>2</sub> O <sub>5</sub> | Na <sub>2</sub> O | ZnO  | K <sub>2</sub> O | NiO  | TiO <sub>2</sub> | MnO  | CO <sub>2</sub> |
|--------|-------|------------------|--------------------------------|--------------------------------|------|-----------------|-------------------------------|-------------------|------|------------------|------|------------------|------|-----------------|
| S5     | 46.02 | 15.99            | 0.09                           | 2.33                           | 0.25 | 0.06            | 0.08                          | 0.13              | 0.00 | 0.01             | 0.05 | 0.03             | 0.00 | 34.96           |
| S7.5   | 45.74 | 15.30            | 0.11                           | 3.44                           | 0.25 | 0.06            | 0.09                          | 0.13              | 0.00 | 0.02             | 0.07 | 0.05             | 0.00 | 34.74           |
| S10    | 45.46 | 14.60            | 0.14                           | 4.55                           | 0.25 | 0.06            | 0.10                          | 0.13              | 0.00 | 0.02             | 0.10 | 0.06             | 0.01 | 34.53           |
| S15    | 44.61 | 13.71            | 0.20                           | 6.77                           | 0.24 | 0.05            | 0.12                          | 0.14              | 0.00 | 0.03             | 0.14 | 0.09             | 0.01 | 33.89           |
| S20    | 44.05 | 12.32            | 0.26                           | 8.99                           | 0.24 | 0.05            | 0.14                          | 0.14              | 0.00 | 0.04             | 0.19 | 0.11             | 0.01 | 33.46           |
| R5     | 46.00 | 15.98            | 0.09                           | 2.33                           | 0.25 | 0.07            | 0.06                          | 0.13              | 0.00 | 0.01             | 0.00 | 0.00             | 0.00 | 34.95           |
| R7.5   | 45.78 | 15.32            | 0.14                           | 3.47                           | 0.25 | 0.07            | 0.05                          | 0.13              | 0.00 | 0.01             | 0.00 | 0.00             | 0.00 | 34.78           |
| R10    | 45.44 | 14.60            | 0.15                           | 4.55                           | 0.24 | 0.06            | 0.05                          | 0.13              | 0.00 | 0.01             | 0.00 | 0.00             | 0.00 | 34.53           |
| R15    | 44.60 | 13.71            | 0.20                           | 6.77                           | 0.24 | 0.06            | 0.05                          | 0.13              | 0.00 | 0.01             | 0.00 | 0.00             | 0.00 | 33.88           |
| R20    | 44.04 | 12.32            | 0.26                           | 8.99                           | 0.24 | 0.06            | 0.05                          | 0.13              | 0.00 | 0.01             | 0.00 | 0.00             | 0.00 | 33.46           |
| S5F    | 45.73 | 15.12            | 1.45                           | 2.33                           | 0.25 | 0.07            | 0.08                          | 0.12              | 0.00 | 0.01             | 0.05 | 0.03             | 0.01 | 34.74           |
| S7.5F  | 45.17 | 14.23            | 2.17                           | 3.44                           | 0.24 | 0.07            | 0.09                          | 0.13              | 0.00 | 0.02             | 0.07 | 0.04             | 0.01 | 34.32           |
| S10F   | 44.61 | 13.35            | 2.88                           | 4.55                           | 0.24 | 0.07            | 0.10                          | 0.13              | 0.00 | 0.02             | 0.10 | 0.06             | 0.01 | 33.89           |
| S15F   | 43.49 | 11.60            | 4.30                           | 6.76                           | 0.24 | 0.07            | 0.12                          | 0.13              | 0.00 | 0.03             | 0.14 | 0.09             | 0.01 | 33.03           |
| S20F   | 42.06 | 10.36            | 5.73                           | 8.98                           | 0.23 | 0.07            | 0.14                          | 0.13              | 0.01 | 0.04             | 0.19 | 0.11             | 0.02 | 31.94           |
| R5F    | 45.76 | 15.14            | 1.47                           | 2.35                           | 0.25 | 0.07            | 0.06                          | 0.12              | 0.00 | 0.01             | 0.00 | 0.00             | 0.01 | 34.77           |
| R7.5F  | 45.22 | 14.26            | 2.19                           | 3.46                           | 0.24 | 0.07            | 0.05                          | 0.12              | 0.00 | 0.01             | 0.00 | 0.00             | 0.01 | 34.35           |
| R10F   | 44.67 | 13.39            | 2.91                           | 4.58                           | 0.24 | 0.07            | 0.05                          | 0.12              | 0.00 | 0.01             | 0.00 | 0.00             | 0.01 | 33.94           |
| R15F   | 43.57 | 11.65            | 4.35                           | 6.81                           | 0.23 | 0.08            | 0.05                          | 0.12              | 0.00 | 0.01             | 0.00 | 0.00             | 0.01 | 33.10           |
| R20F   | 42.18 | 10.42            | 5.80                           | 9.05                           | 0.23 | 0.08            | 0.05                          | 0.12              | 0.00 | 0.01             | 0.00 | 0.00             | 0.01 | 32.04           |

**Table S2.** Oxide composition of the clinker raw meals optimised by the proposed dosing method.

Table S3 presents the oxide composition of clinker raw meals from previous studies simulated for method validation.

| ID | CaO   | SiO <sub>2</sub> | Al <sub>2</sub> O <sub>3</sub> | Fe <sub>2</sub> O <sub>3</sub> | K <sub>2</sub> O | Na <sub>2</sub> O | MgO  | TiO <sub>2</sub> | SrO  | SO <sub>3</sub> | P <sub>2</sub> O <sub>5</sub> | V <sub>2</sub> O <sub>5</sub> | Cr <sub>2</sub> O <sub>3</sub> | MnO  | ZnO  | Cl   | F    | T (°C) | Ref |
|----|-------|------------------|--------------------------------|--------------------------------|------------------|-------------------|------|------------------|------|-----------------|-------------------------------|-------------------------------|--------------------------------|------|------|------|------|--------|-----|
| 01 | 58.16 | 16.17            | 5.05                           | 5.39                           | 1.04             | 0.65              | 8.08 | 0.25             | 0.00 | 0.85            | 3.25                          | 0.04                          | 0.08                           | 0.42 | 0.04 | 0.03 | 0.51 | 1380   | 31  |
| 02 | 64.75 | 21.37            | 4.31                           | 5.42                           | 0.64             | 0.32              | 2.87 | 0.00             | 0.00 | 0.32            | 0.00                          | 0.00                          | 0.00                           | 0.00 | 0.00 | 0.00 | 0.00 | 1450   | 73  |
| 03 | 68.91 | 24.48            | 3.22                           | 0.82                           | 0.39             | 0.67              | 1.51 | 0.00             | 0.00 | 0.00            | 0.00                          | 0.00                          | 0.00                           | 0.00 | 0.00 | 0.00 | 0.00 | 1500   | 72  |
| 04 | 65.29 | 24.28            | 4.90                           | 4.38                           | 0.32             | 0.01              | 0.73 | 0.00             | 0.00 | 0.08            | 0.00                          | 0.00                          | 0.00                           | 0.00 | 0.00 | 0.00 | 0.00 | 1470   | 70  |
| 05 | 65.50 | 23.75            | 4.80                           | 4.32                           | 0.31             | 0.14              | 0.87 | 0.00             | 0.00 | 0.30            | 0.00                          | 0.00                          | 0.00                           | 0.00 | 0.00 | 0.00 | 0.00 | 1470   | 70  |
| 06 | 65.68 | 20.82            | 4.44                           | 2.79                           | 1.29             | 0.21              | 2.77 | 0.23             | 0.00 | 1.64            | 0.03                          | 0.00                          | 0.00                           | 0.00 | 0.02 | 0.09 | 0.00 | 1500   | 23  |
| 07 | 66.56 | 21.25            | 6.34                           | 5.23                           | 0.27             | 0.13              | 0.07 | 0.01             | 0.09 | 0.01            | 0.04                          | 0.00                          | 0.00                           | 0.00 | 0.00 | 0.00 | 0.00 | 1450   | 74  |
| 08 | 61.74 | 24.56            | 6.23                           | 5.13                           | 2.01             | 0.12              | 0.06 | 0.01             | 0.09 | 0.01            | 0.04                          | 0.00                          | 0.00                           | 0.00 | 0.00 | 0.00 | 0.00 | 1360   | 74  |
| 09 | 62.59 | 24.90            | 6.31                           | 5.21                           | 0.27             | 0.50              | 0.07 | 0.01             | 0.09 | 0.01            | 0.04                          | 0.00                          | 0.00                           | 0.00 | 0.00 | 0.00 | 0.00 | 1360   | 74  |
| 10 | 62.81 | 25.00            | 6.34                           | 5.23                           | 0.27             | 0.13              | 0.07 | 0.01             | 0.09 | 0.01            | 0.04                          | 0.00                          | 0.00                           | 0.00 | 0.00 | 0.00 | 0.00 | 1360   | 75  |
| 11 | 62.35 | 24.81            | 6.29                           | 5.19                           | 1.01             | 0.13              | 0.07 | 0.01             | 0.09 | 0.01            | 0.04                          | 0.00                          | 0.00                           | 0.00 | 0.00 | 0.00 | 0.00 | 1360   | 75  |
| 12 | 61.97 | 24.65            | 6.25                           | 5.15                           | 0.26             | 1.50              | 0.07 | 0.01             | 0.09 | 0.01            | 0.04                          | 0.00                          | 0.00                           | 0.00 | 0.00 | 0.00 | 0.00 | 1360   | 75  |
| 13 | 53.90 | 36.10            | 10.00                          | 0.00                           | 0.00             | 0.00              | 0.00 | 0.00             | 0.00 | 0.00            | 0.00                          | 0.00                          | 0.00                           | 0.00 | 0.00 | 0.00 | 0.00 | 1400   | 71  |
| 14 | 47.90 | 32.10            | 20.00                          | 0.00                           | 0.00             | 0.00              | 0.00 | 0.00             | 0.00 | 0.00            | 0.00                          | 0.00                          | 0.00                           | 0.00 | 0.00 | 0.00 | 0.00 | 1400   | 71  |
| 15 | 56.40 | 33.60            | 10.00                          | 0.00                           | 0.00             | 0.00              | 0.00 | 0.00             | 0.00 | 0.00            | 0.00                          | 0.00                          | 0.00                           | 0.00 | 0.00 | 0.00 | 0.00 | 1400   | 71  |
| 16 | 50.10 | 29.90            | 20.00                          | 0.00                           | 0.00             | 0.00              | 0.00 | 0.00             | 0.00 | 0.00            | 0.00                          | 0.00                          | 0.00                           | 0.00 | 0.00 | 0.00 | 0.00 | 1400   | 71  |
| 17 | 58.60 | 31.40            | 10.00                          | 0.00                           | 0.00             | 0.00              | 0.00 | 0.00             | 0.00 | 0.00            | 0.00                          | 0.00                          | 0.00                           | 0.00 | 0.00 | 0.00 | 0.00 | 1400   | 71  |
| 18 | 62.20 | 27.80            | 10.00                          | 0.00                           | 0.00             | 0.00              | 0.00 | 0.00             | 0.00 | 0.00            | 0.00                          | 0.00                          | 0.00                           | 0.00 | 0.00 | 0.00 | 0.00 | 1400   | 71  |
| 19 | 56.70 | 23.30            | 20.00                          | 0.00                           | 0.00             | 0.00              | 0.00 | 0.00             | 0.00 | 0.00            | 0.00                          | 0.00                          | 0.00                           | 0.00 | 0.00 | 0.00 | 0.00 | 1400   | 71  |
| 20 | 57.90 | 22.10            | 20.00                          | 0.00                           | 0.00             | 0.00              | 0.00 | 0.00             | 0.00 | 0.00            | 0.00                          | 0.00                          | 0.00                           | 0.00 | 0.00 | 0.00 | 0.00 | 1400   | 71  |
| 21 | 58.90 | 21.10            | 20.00                          | 0.00                           | 0.00             | 0.00              | 0.00 | 0.00             | 0.00 | 0.00            | 0.00                          | 0.00                          | 0.00                           | 0.00 | 0.00 | 0.00 | 0.00 | 1400   | 71  |

**Table S3.** Oxide composition of clinker raw meals simulated for method validation.
